# Supplementary material for: A novel hygroscopic salt-modified MOF-303 with efficient solar-driven water harvesting from arid air
Source: Royal Society of Chemistry journal article supplement (doi:10.1039/d5nr00482a), 2025-01-01
Supplement: d5nr00482a1.pdf [file d5nr00482a1.pdf]

## Supporting Information

### **A novel hygroscopic salt-modified MOF-303 with efficient solar-driven water harvesting from arid air**

Guangyi Tian <sup>a</sup>, Changhui Fu <sup>a</sup>, Zhiguang Guo <sup>\*a,b</sup>

*a Ministry of Education Key Laboratory for the Green Preparation and Application of Functional Materials, Hubei University, Wuhan 430062, People's Republic of China.*

*b State Key Laboratory of Solid Lubrication, Lanzhou Institute of Chemical Physics, Chinese Academy of Sciences, Lanzhou 730000, People's Republic of China.*

#### **\*Corresponding Authors**

*Tel: 0086-931-4968105; Fax: 0086-931-8277088.*

*Email address: zguo@licp.cas.cn (Z Guo).*

## Contents

### Supporting Figures

Figure. S1. Estimated differential and cumulative pore volume of MOF-303@LiCl based on the N<sub>2</sub> adsorption isotherm at 77 K.

Figure. S2. EDS elemental content of MOF-303@LiCl.

Figure. S3. EDS images of MOF-303 and the content of each element.

Figure. S4. XPS fine spectra of each sample.

Figure. S5. Photograph of the sample after saturation adsorption.

Figure. S6. Infrared imaging images of the sample surface under xenon lamp irradiation.

Figure. S7. Photographs of xenon lamp desorption equipment.

### Supporting Table

Table. S1. EDS elemental content of MOF-303@LiCl.

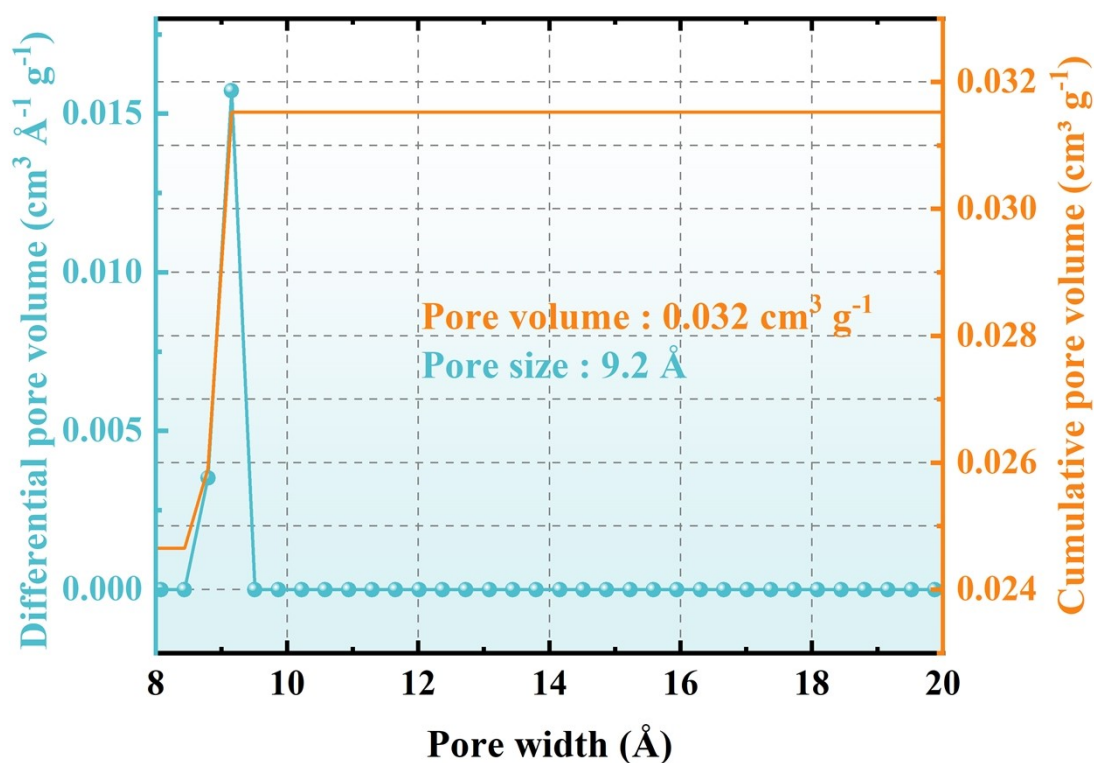

Figure. S1. Estimated differential and cumulative pore volume of MOF-303@LiCl based on the N<sub>2</sub> adsorption isotherm at 77 K.

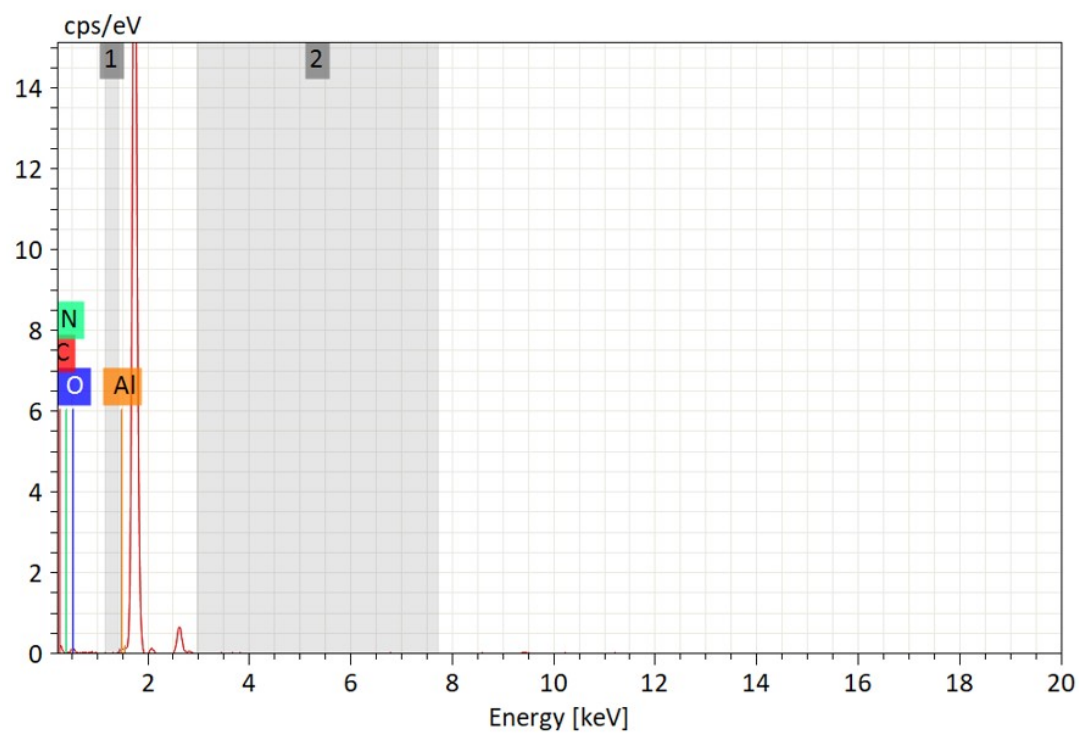

Figure. S2. EDS elemental content of MOF-303@LiCl.

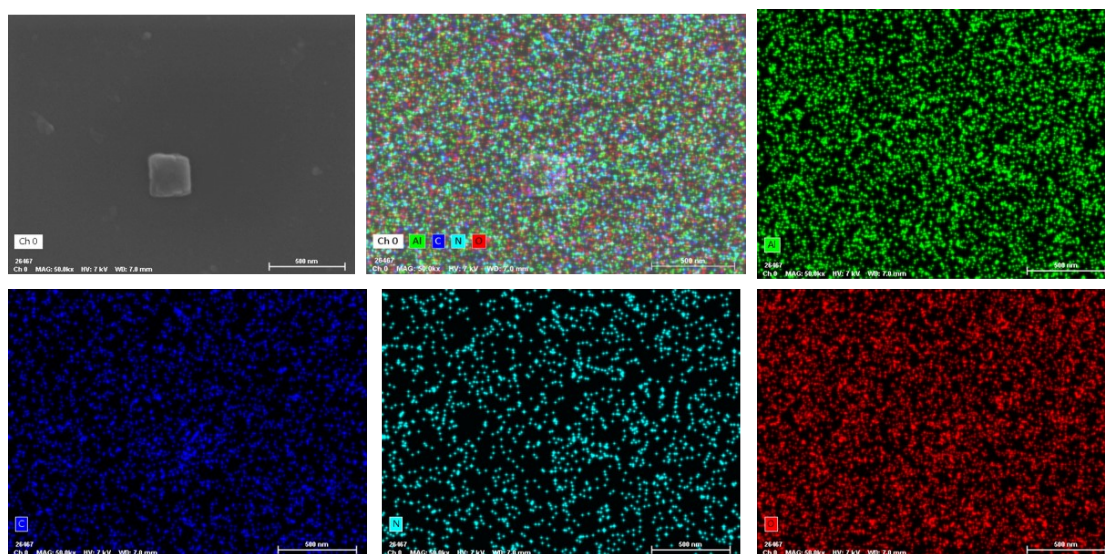

Figure. S3. EDS images of MOF-303.

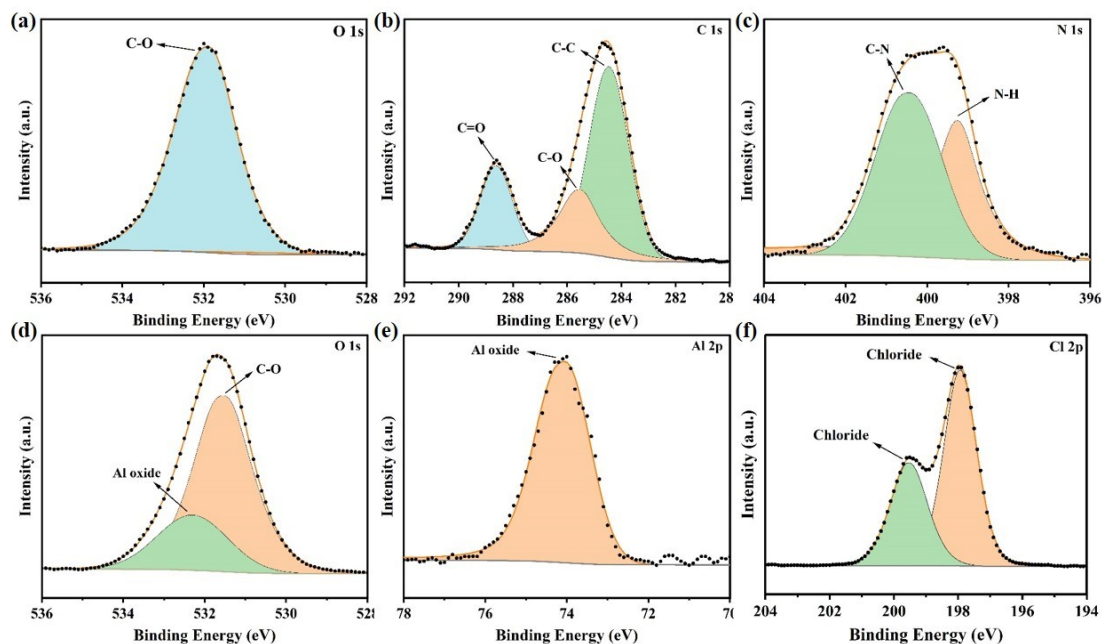

Figure. S4. (a) O 1s fine spectra of MOF-303.(b-f) XPS fine spectra of MOF-303@LiCl.

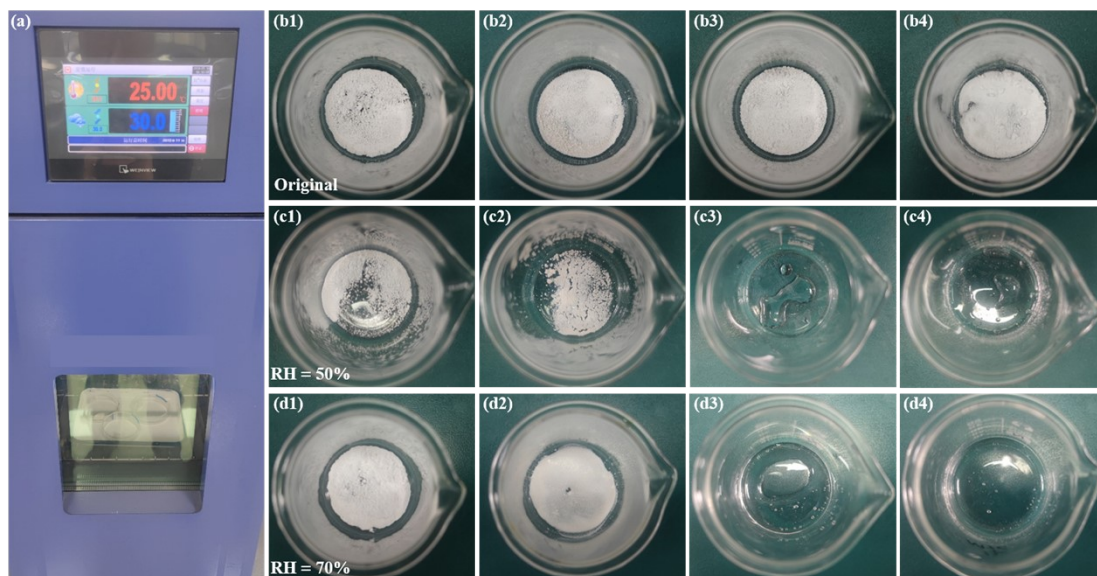

Figure. S5. (a) Constant temperature and humidity box equipment diagram. MOF-303 (b1) 、MOF-303@LiCl (b2) 、CaCl<sub>2</sub> (b3) and LiCl (b4) original sample images. Schematic of the desert beetle structure. (c) Plot of saturated adsorbed samples at 50% relative humidity. (d) Plot of saturated adsorbed samples at 70% relative humidity.



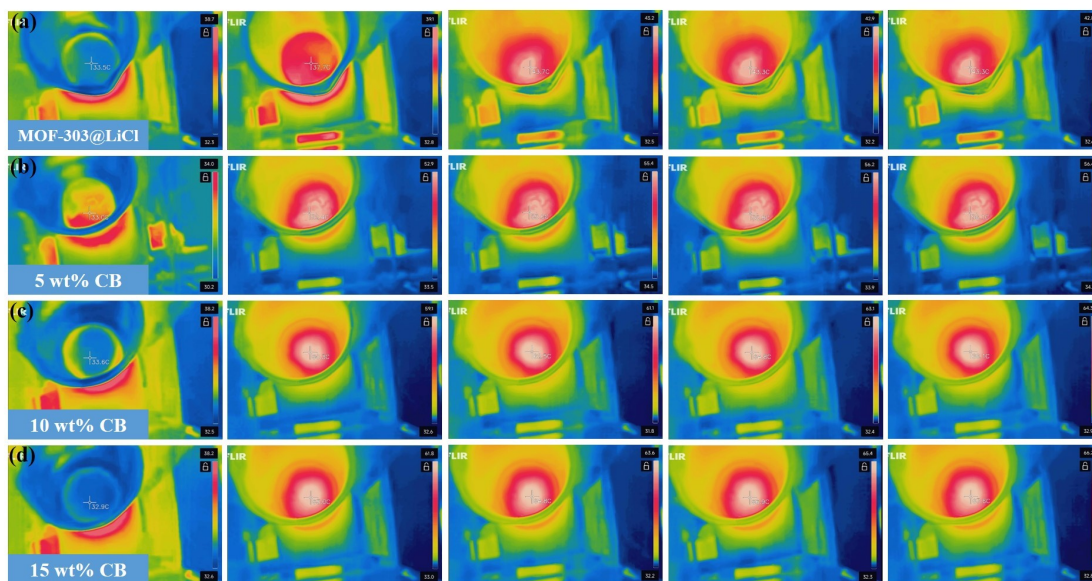

Figure. S6. Infrared imaging images of the sample surface under xenon lamp irradiation.

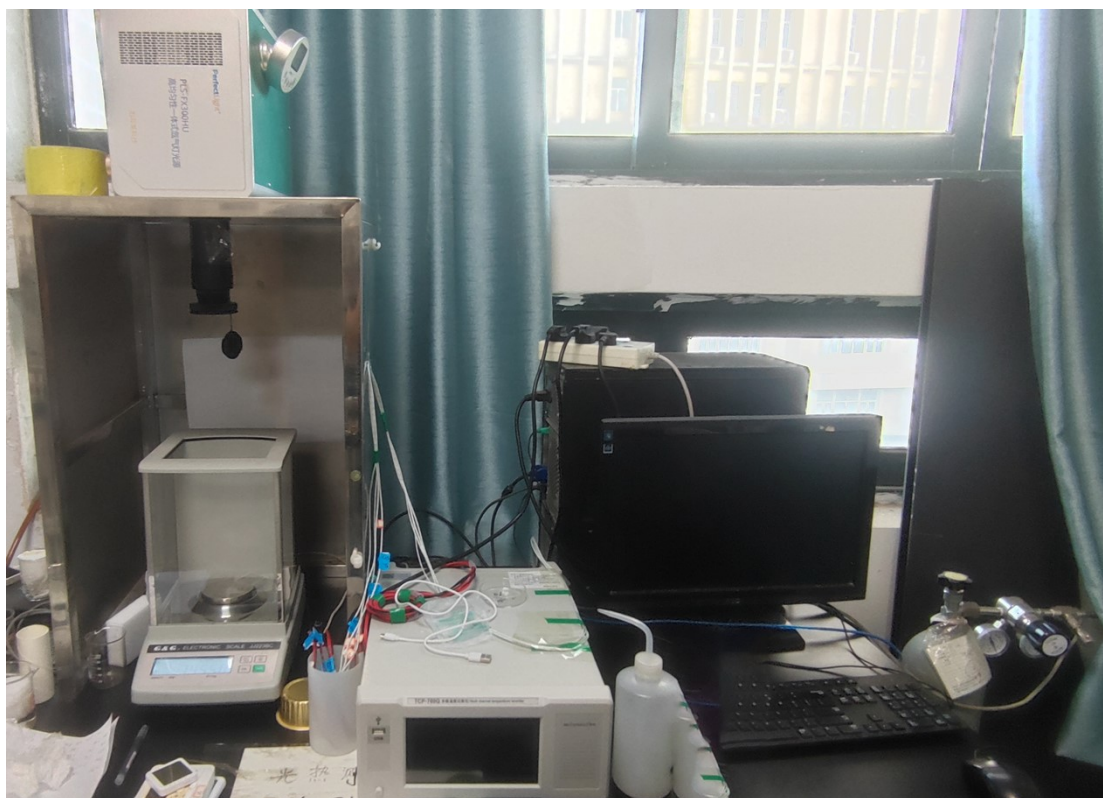

Figure. S7. Photographs of xenon lamp desorption equipment.

Table. S1. EDS elemental content of MOF-303@LiCl.

| Elemental | Atomic number | Mass (%) | Normalized mass (%) | Atom (%) |
|-----------|---------------|----------|---------------------|----------|
| O         | 8             | 3.62     | 21.93               | 20.23    |
| C         | 6             | 7.56     | 45.75               | 56.21    |
| N         | 7             | 2.56     | 15.51               | 16.34    |
| Al        | 13            | 0.28     | 1.72                | 0.94     |
| Cl        | 17            | 2.49     | 15.09               | 6.28     |
| Total     |               | 16.52    | 100.00              | 100.00   |
